# Supplementary material for: DynPeak: An Algorithm for Pulse Detection and Frequency Analysis in Hormonal Time Series
Source: PubMed Central journal article supplement (PMC3389032; doi:10.1371/journal.pone.0039001), 2012-07-03
Supplement: pone.0039001.s005.pdf [file pone.0039001.s005.pdf]

|                                                        | UD assay error |     |     |     |     |     | ND assay error |     |     |     |     |     |
|--------------------------------------------------------|----------------|-----|-----|-----|-----|-----|----------------|-----|-----|-----|-----|-----|
| <i>b</i> value (for UD)<br>or <i>SD</i> value (for ND) | 20 %           | 25% | 30% | 32% | 38% | 40% | 20%            | 25% | 30% | 32% | 38% | 40% |
| Well-detected<br>time series                           | 10             | 9   | 8   | 6   | 3   | 2   | 10             | 10  | 8   | 5   | 2   | 1   |
| Over- or under-detection<br>with IPI outlier           | 0              | 1   | 2   | 4   | 6   | 8   | 0              | 0   | 2   | 5   | 7   | 8   |
| Over- or under-detection<br>without IPI outlier        | 0              | 0   | 0   | 0   | 1   | 0   | 0              | 0   | 0   | 0   | 1   | 1   |
